# Supplementary material for: Next generation sequencing of triple negative breast cancer to find predictors for chemotherapy response
Source: PubMed Central journal article supplement (PMC4592753; doi:10.1186/s13058-015-0642-8), 2015-10-03

patient #2514

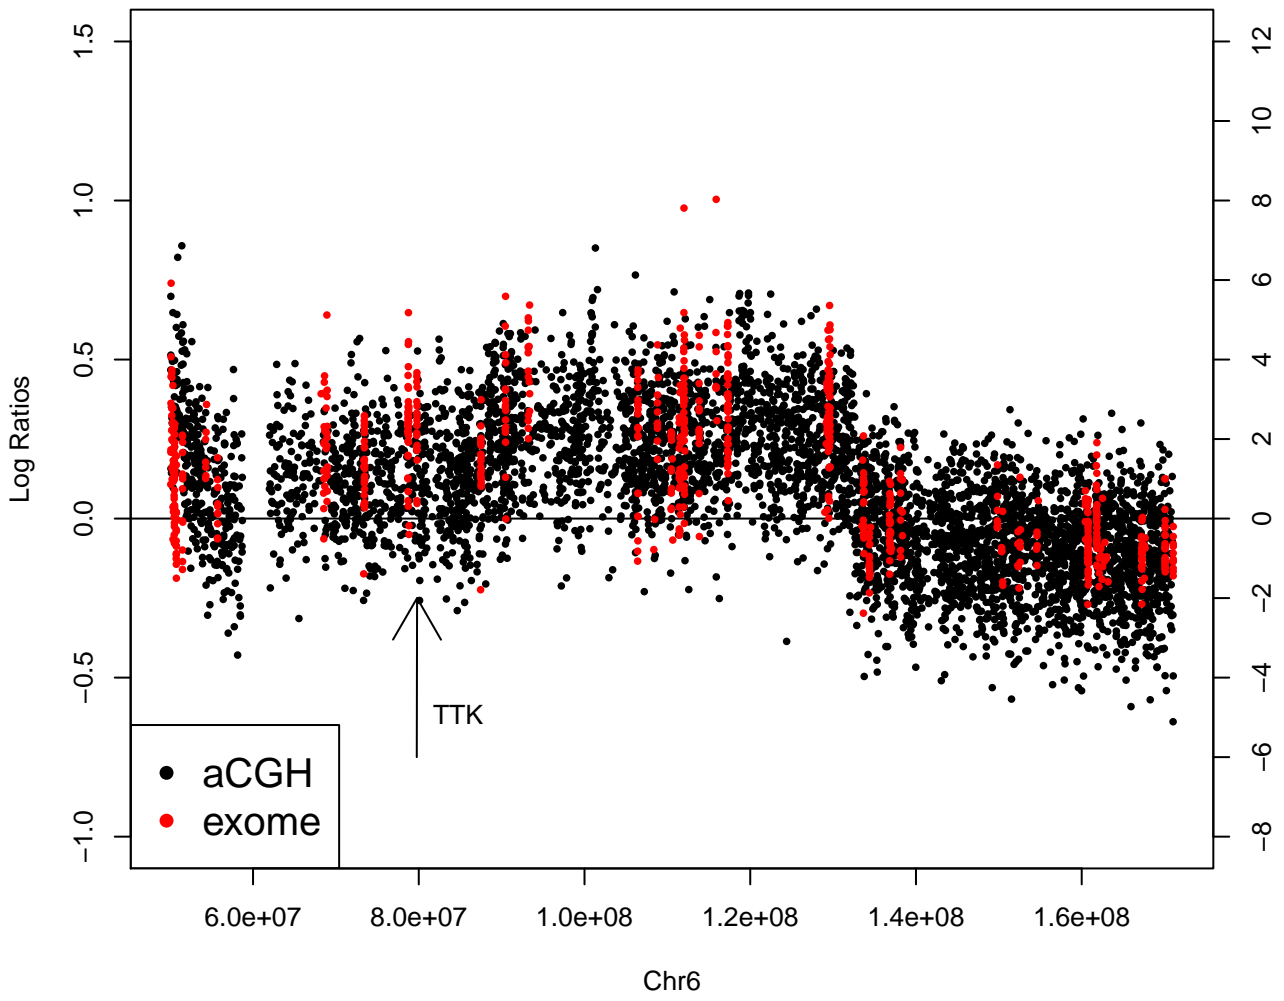

patient #2512

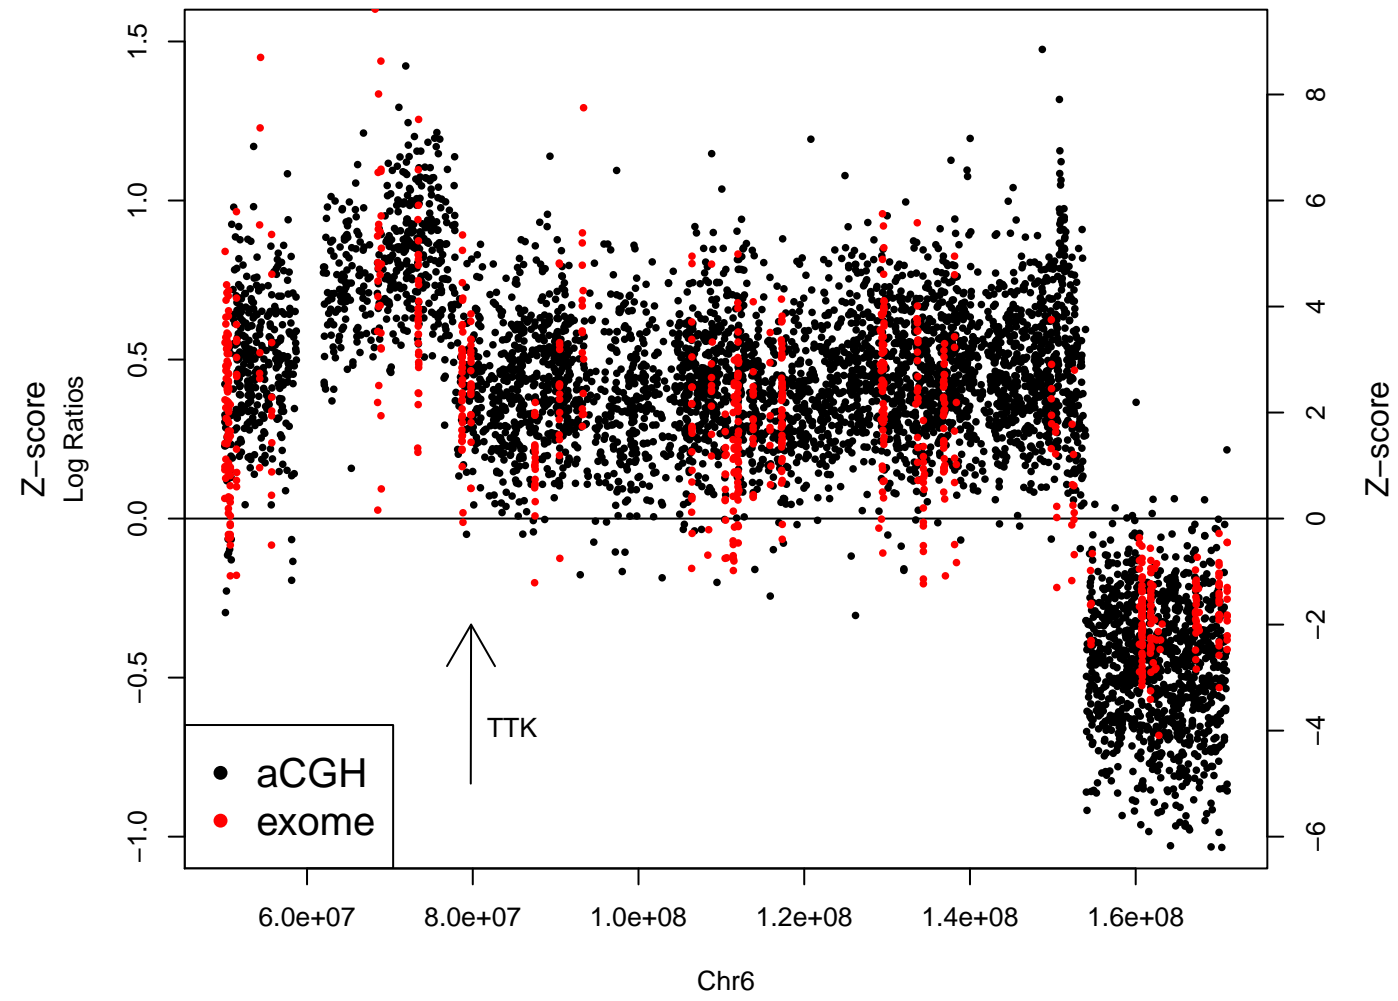

patient #168

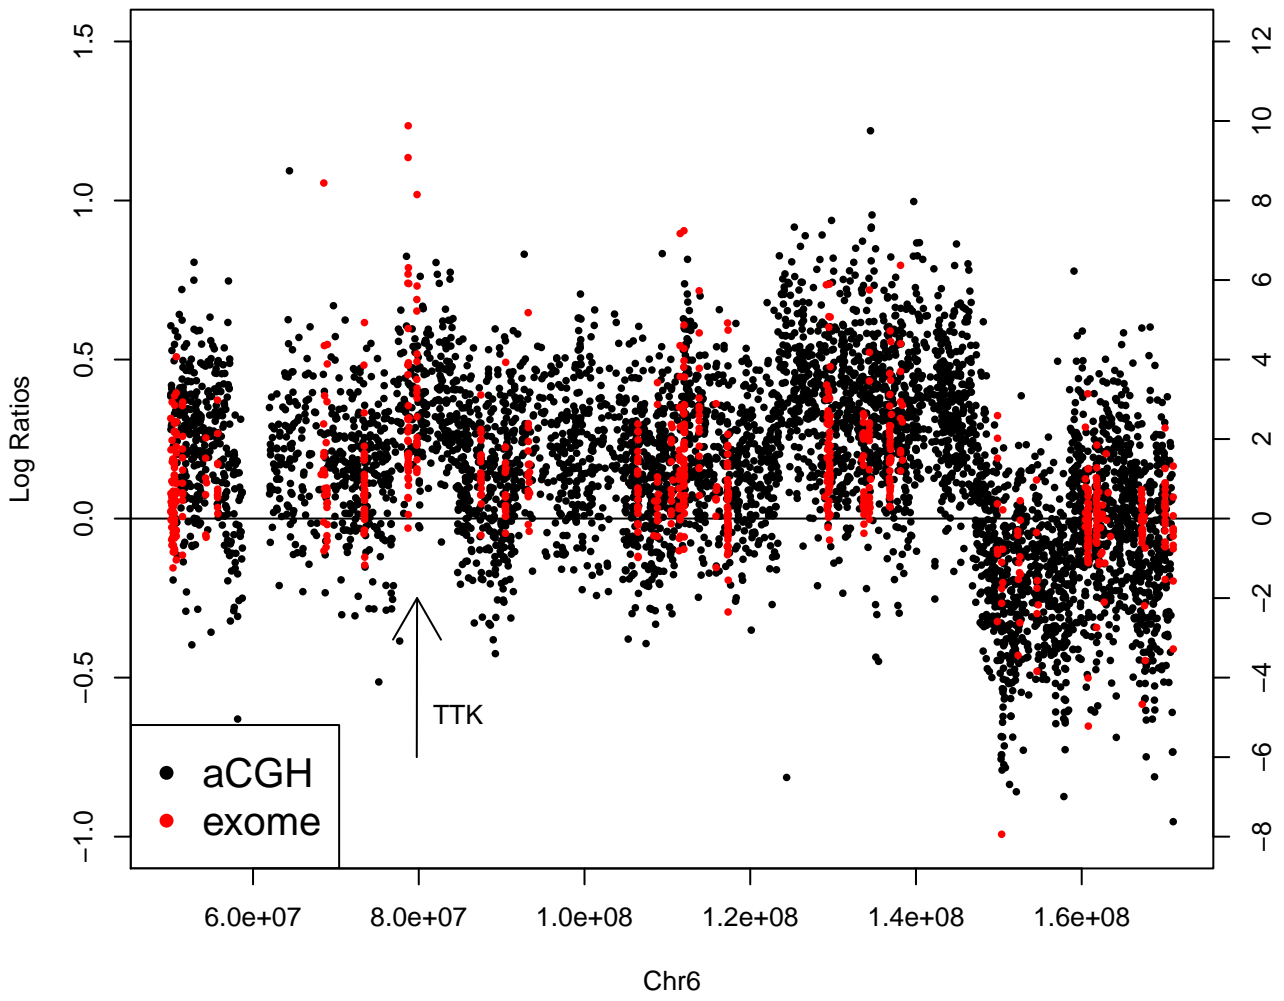

patient #168

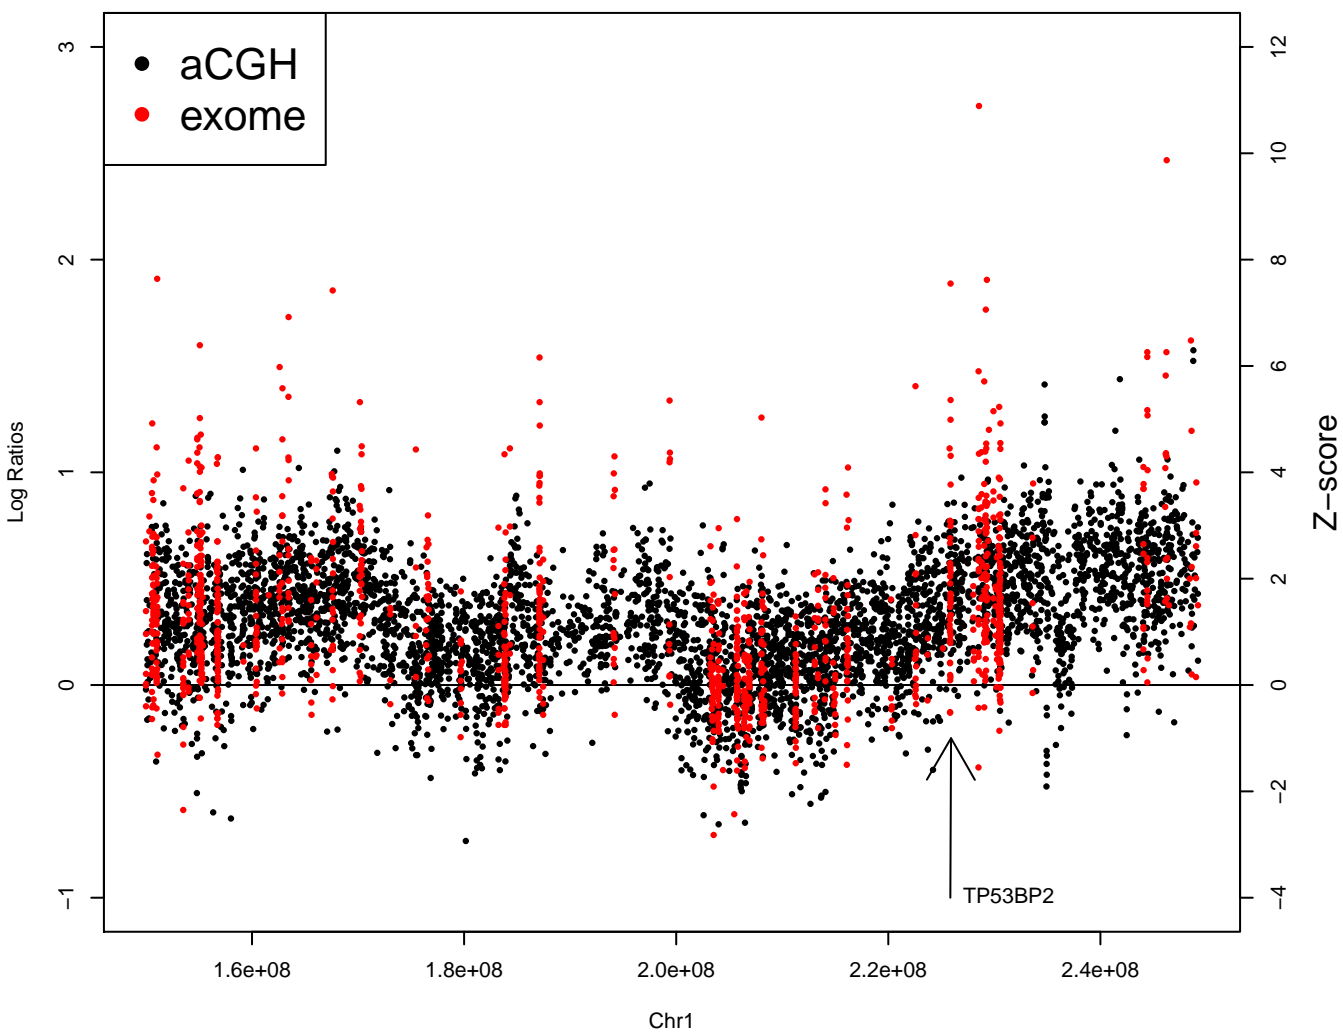

patient #2452

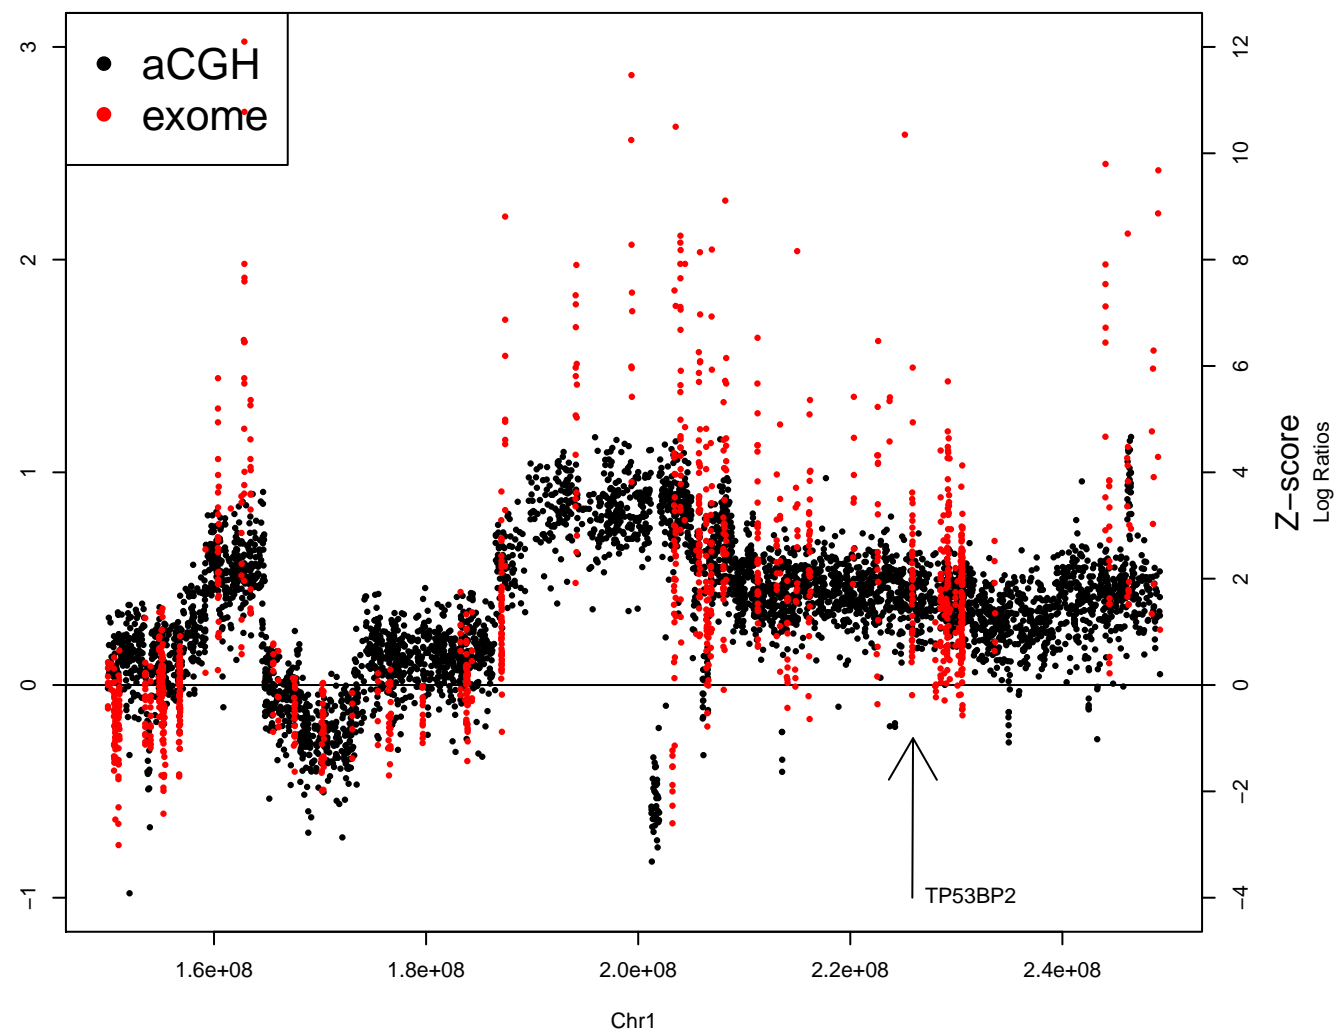

patient #2005

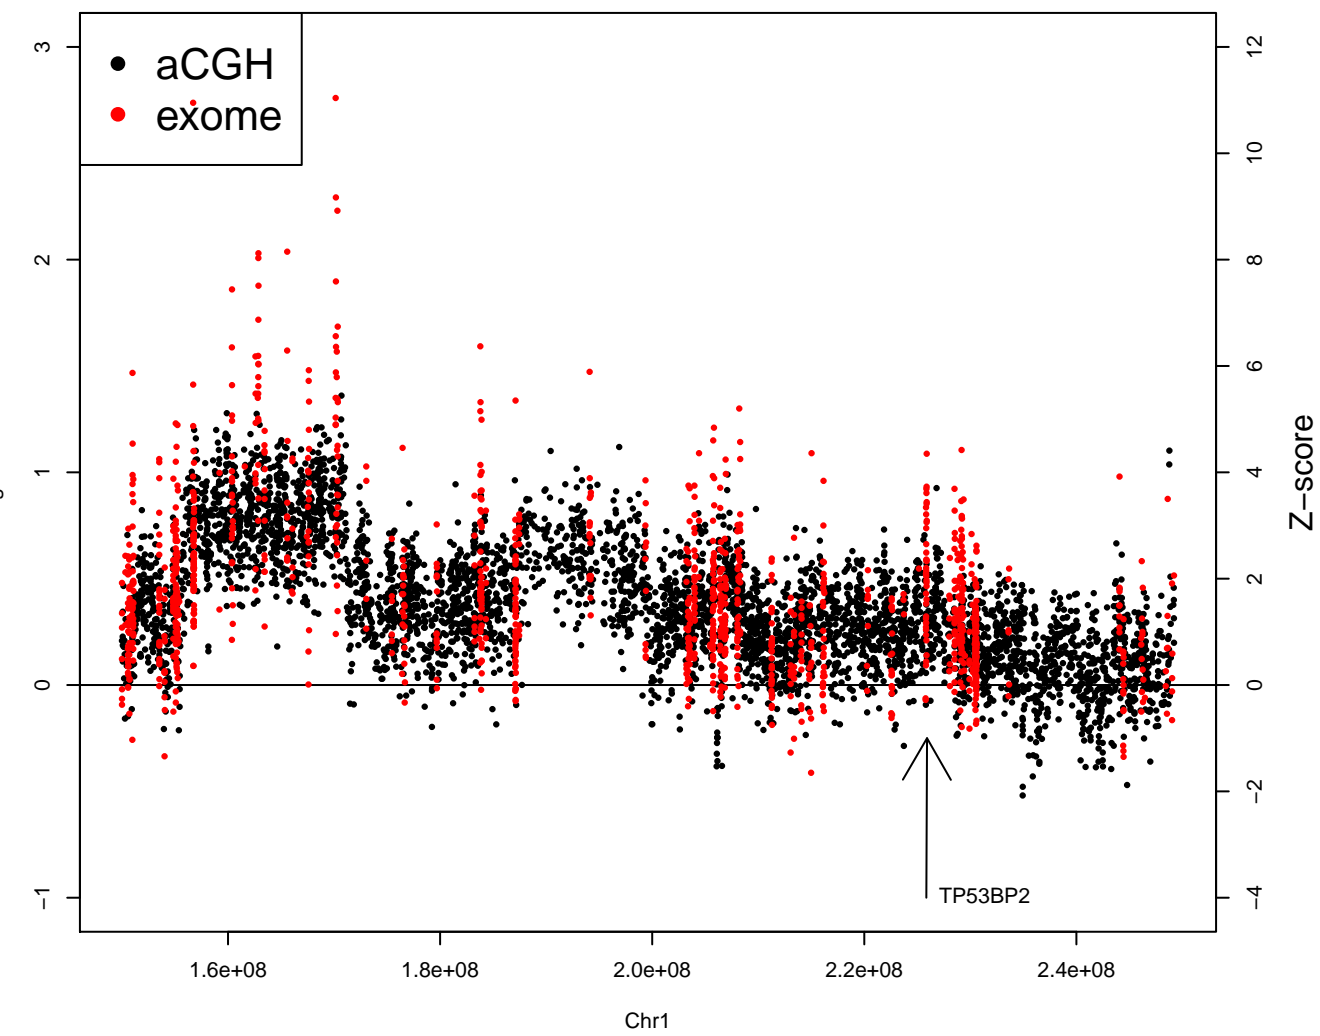

patient #2271

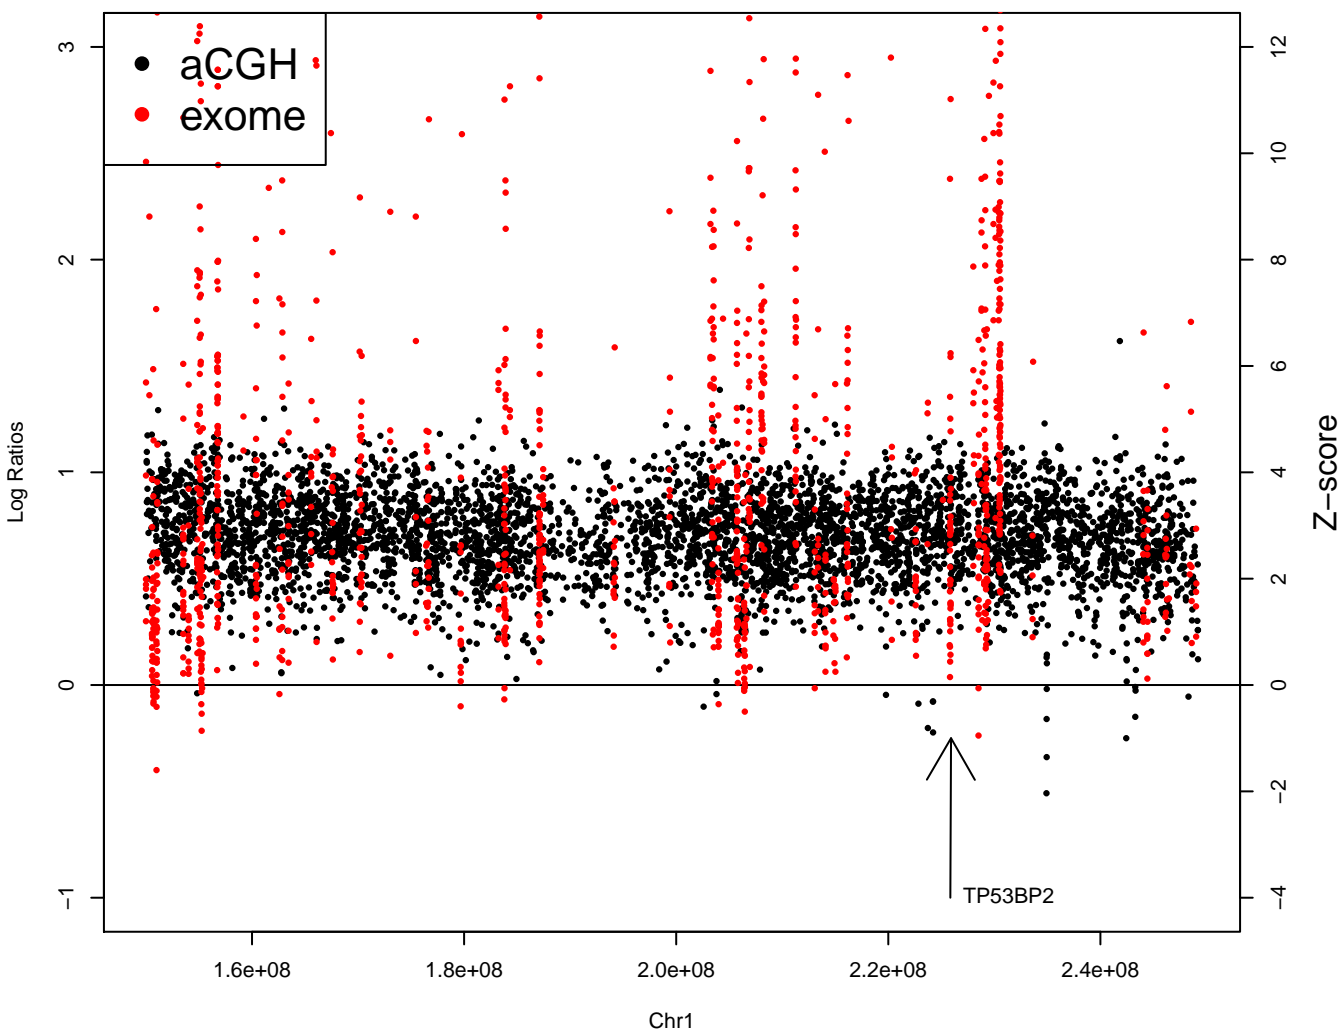

patient #2512

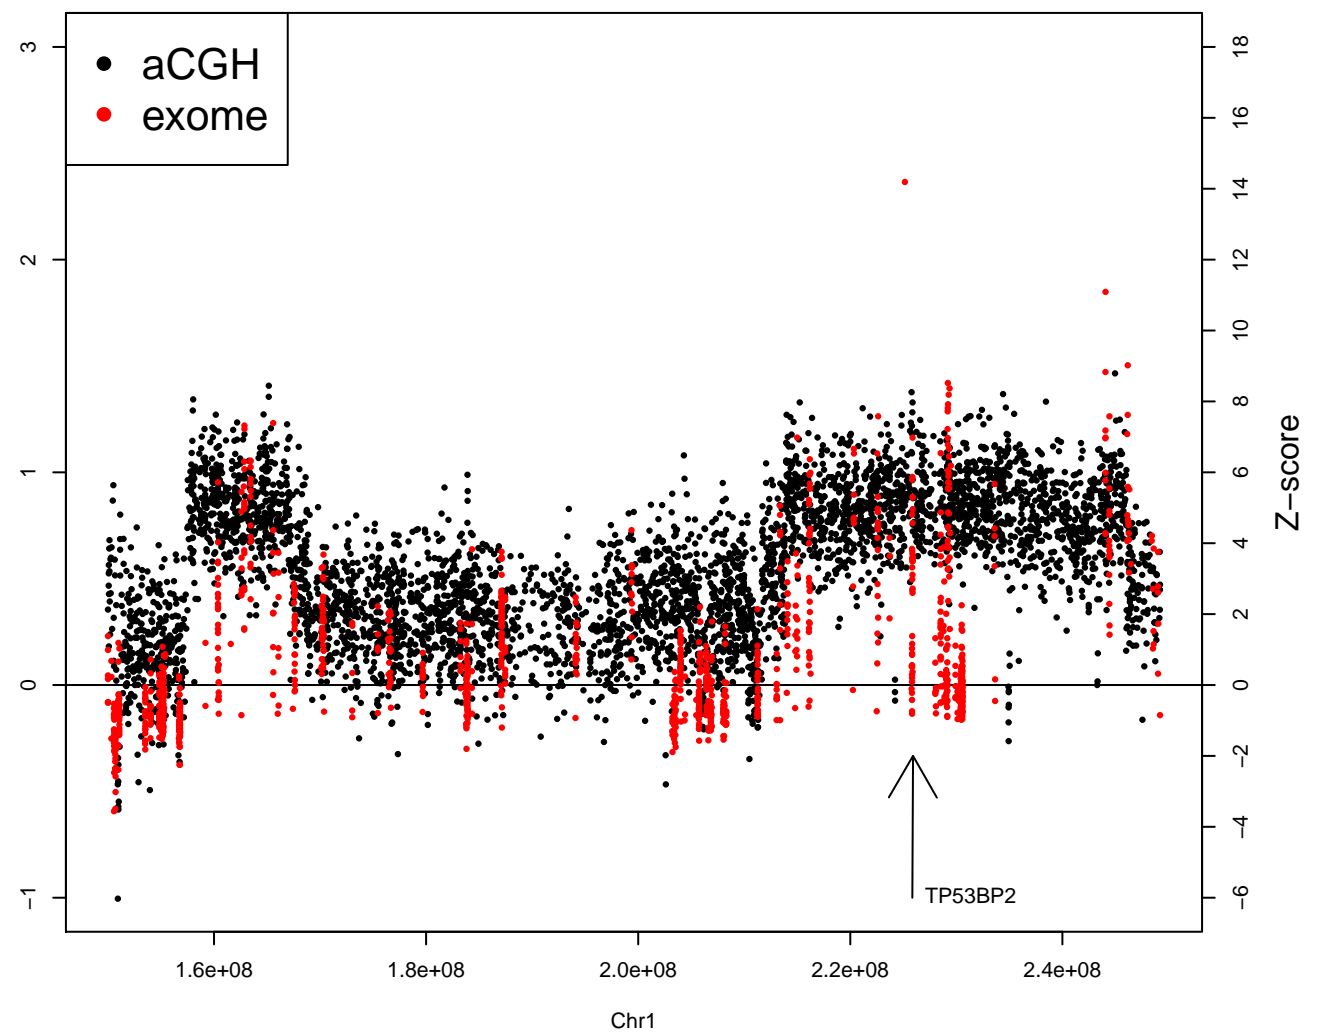

**Patient #2585 exome data**

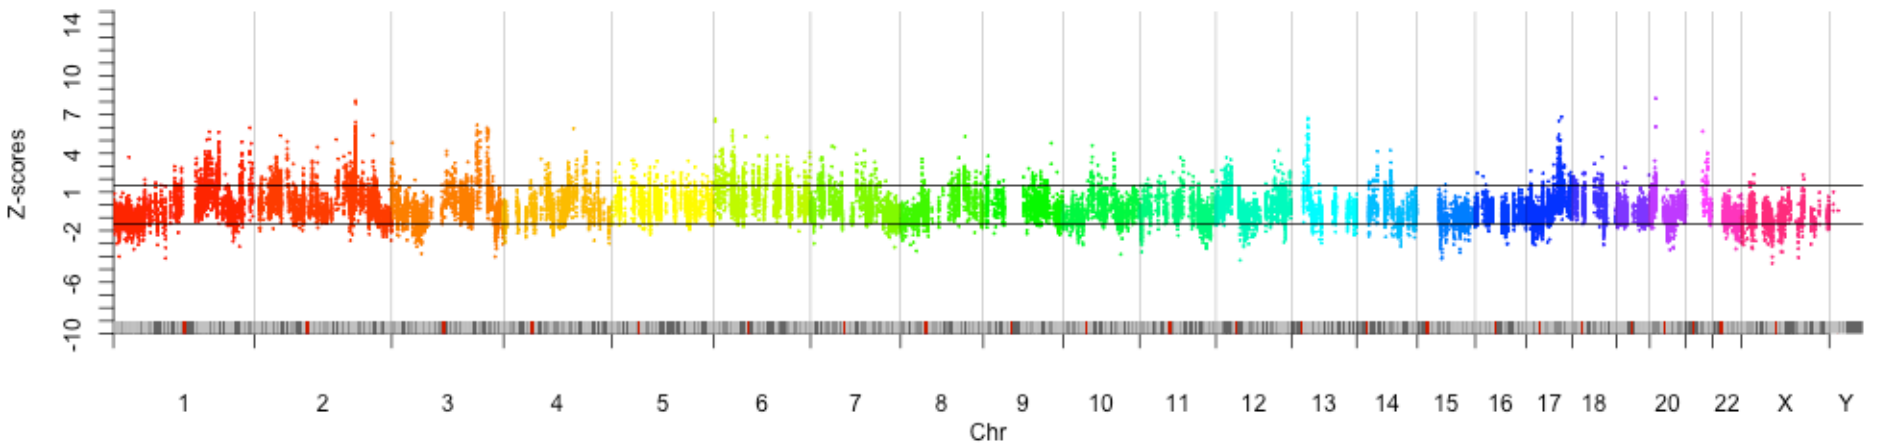

**patient #2585 aCGH data**

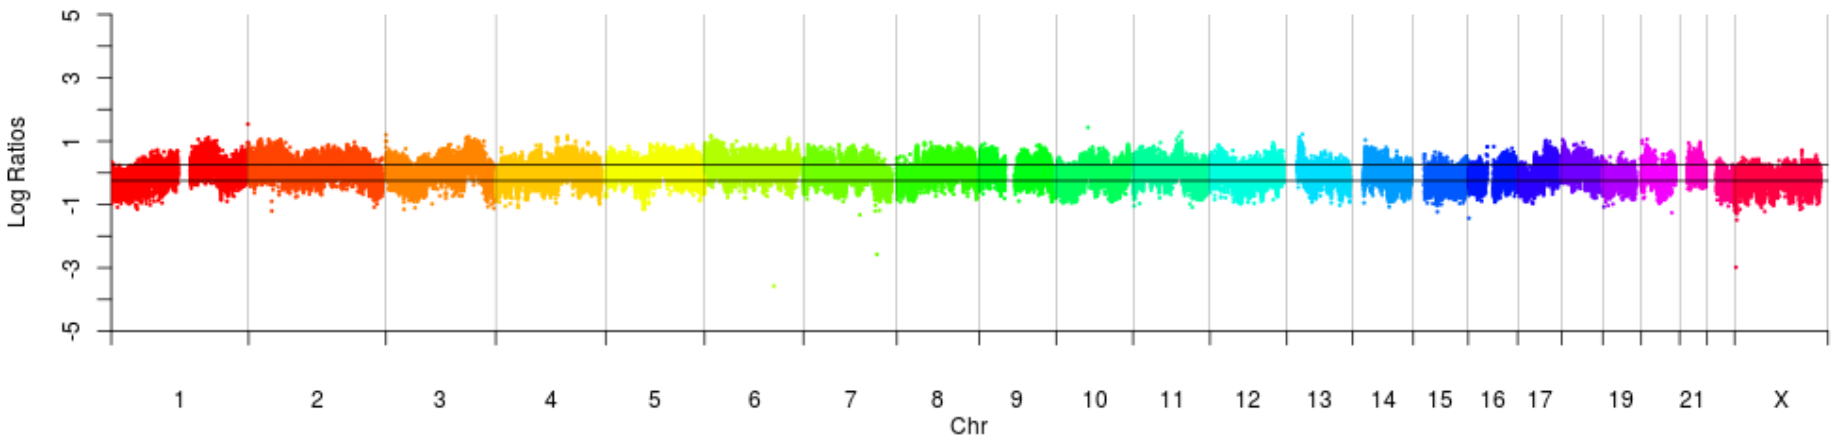

**Patient #2532 exome data**

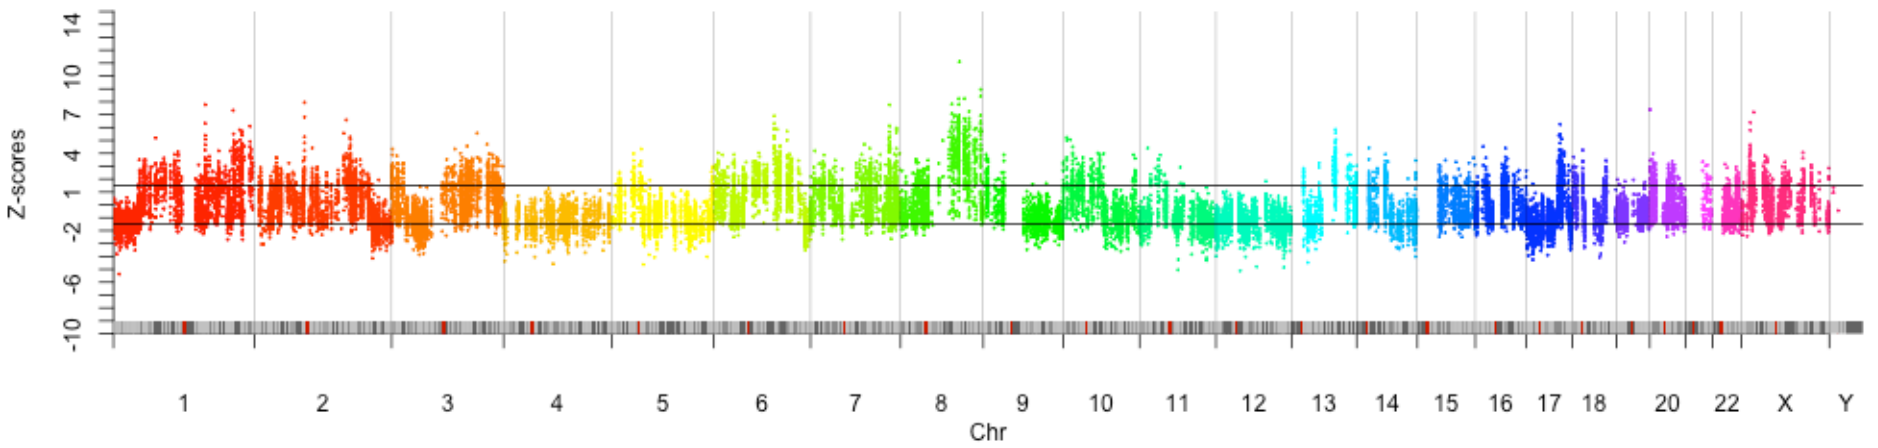

**patient #2532 aCGH data**

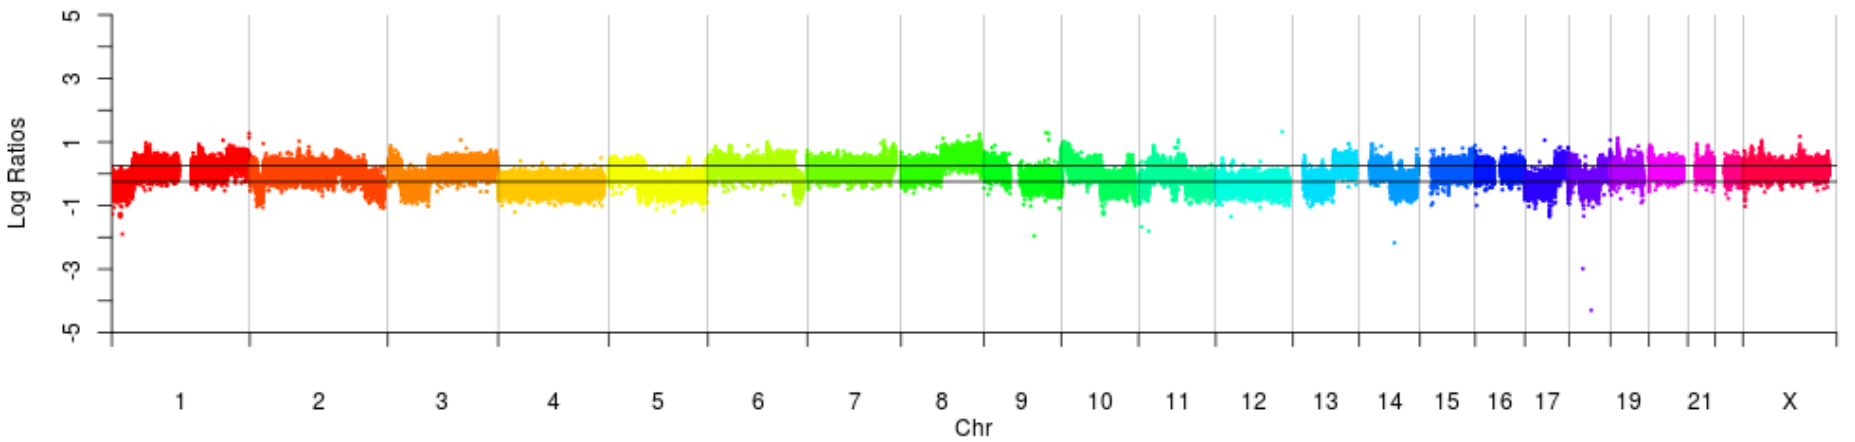

**Patient #2514 exome data**

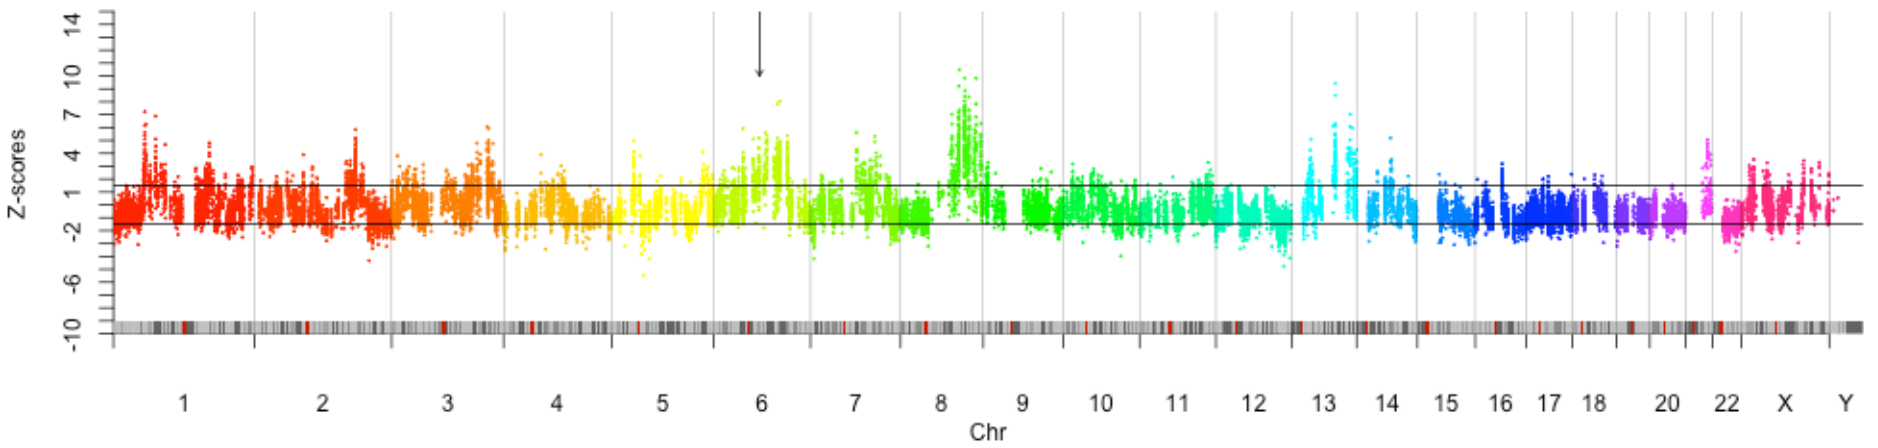

**patient #2514 aCGH data**

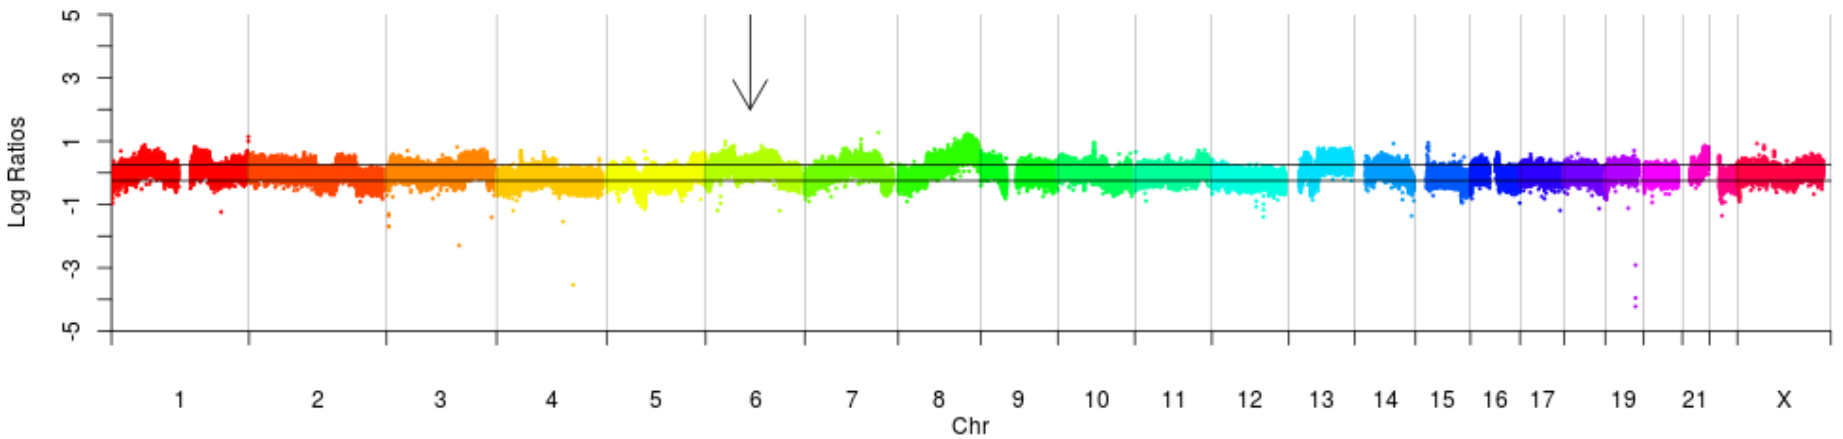

**Patient #2512 exome data**

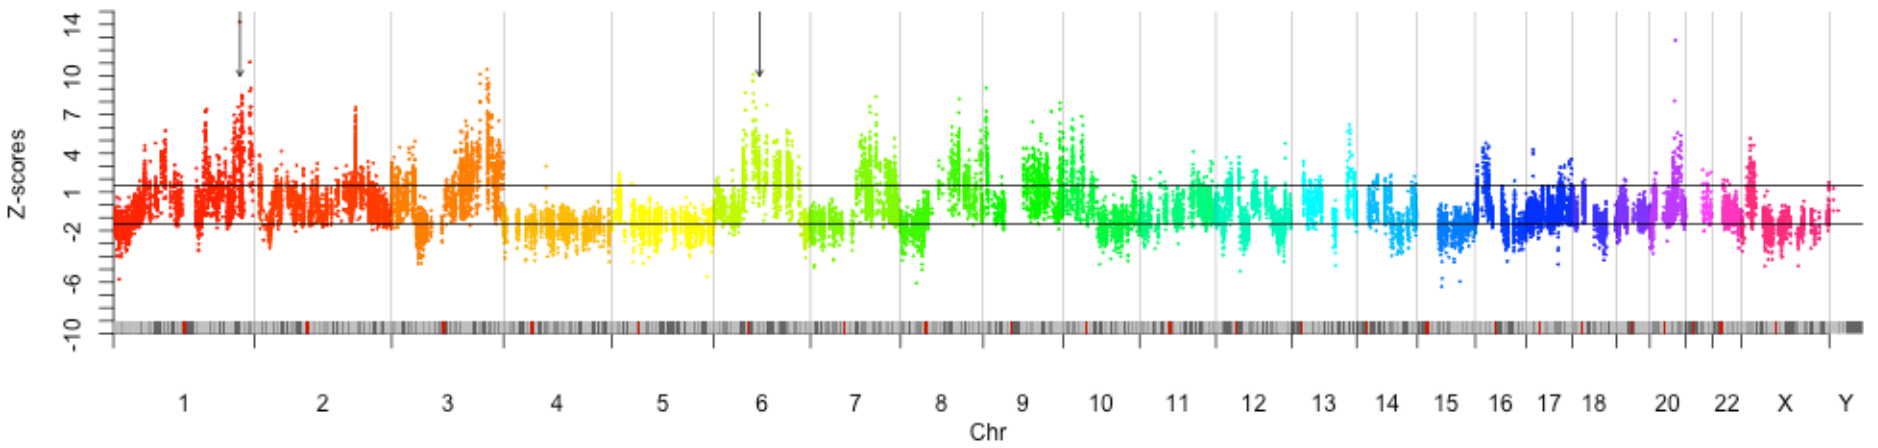

**patient #2512 aCGH data**

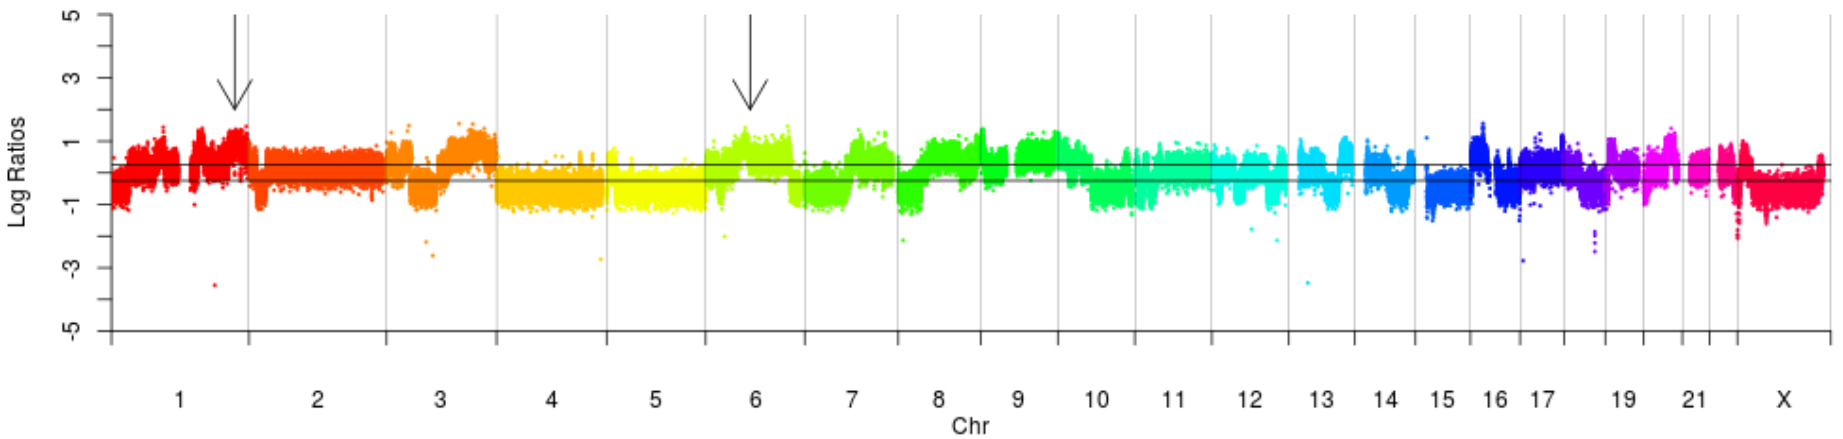

**Patient #2498 exome data**

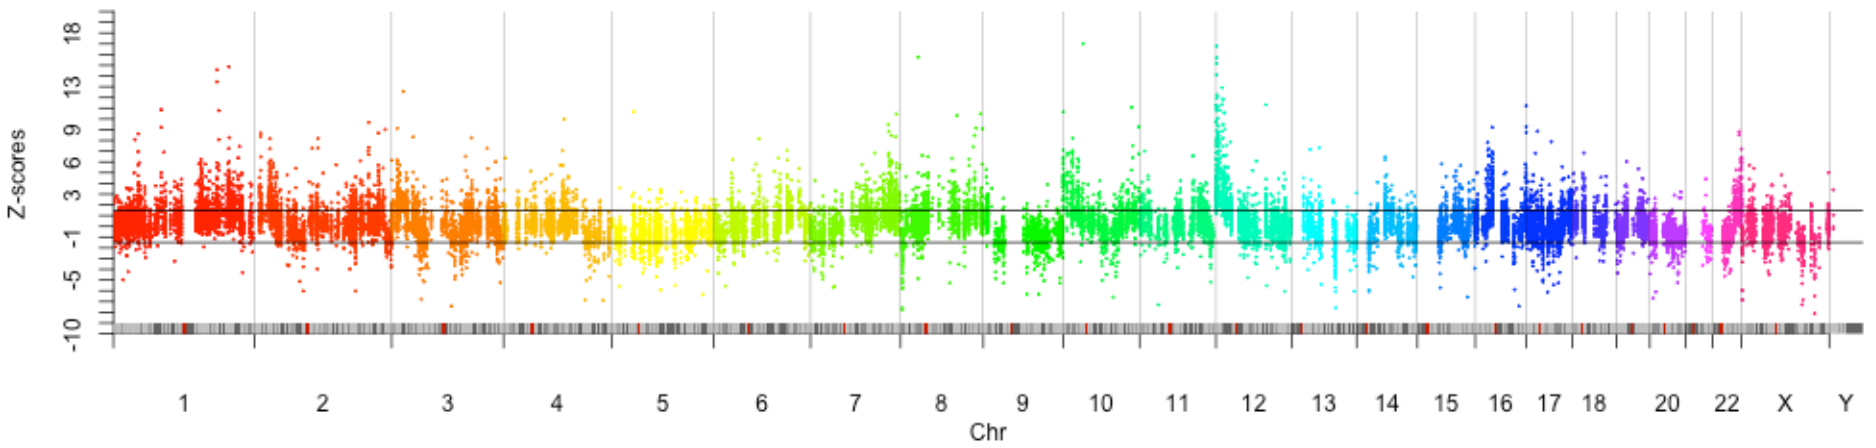

**patient #2498 aCGH data**

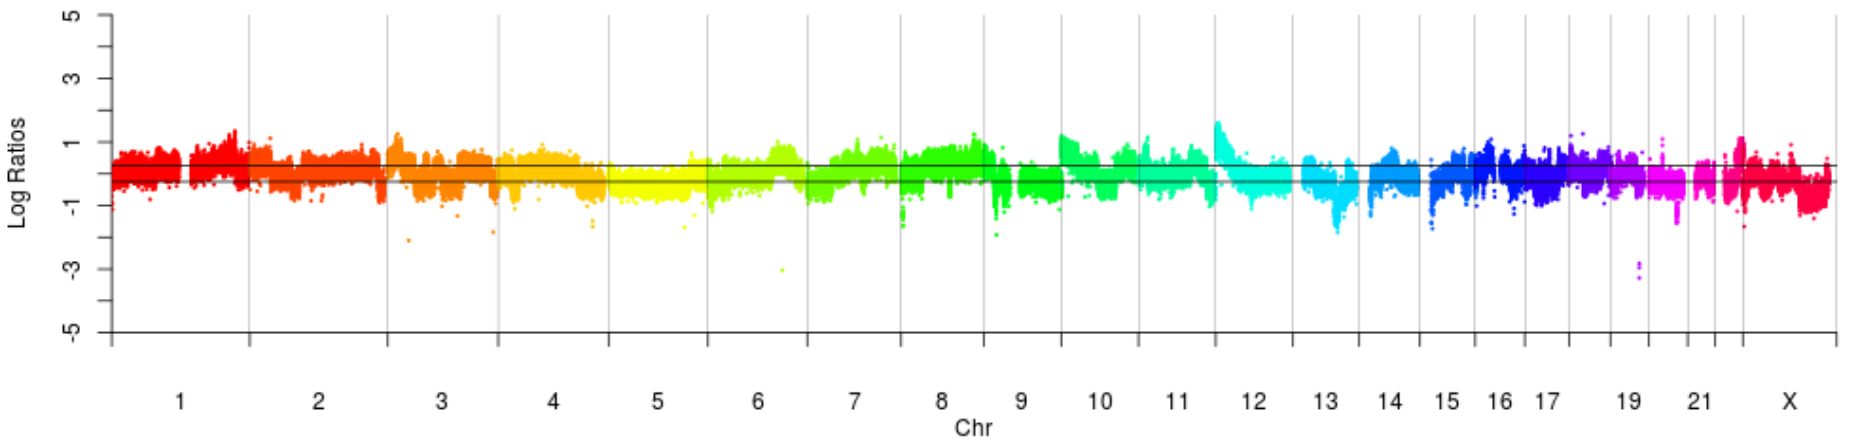

**Patient #2491 exome data**

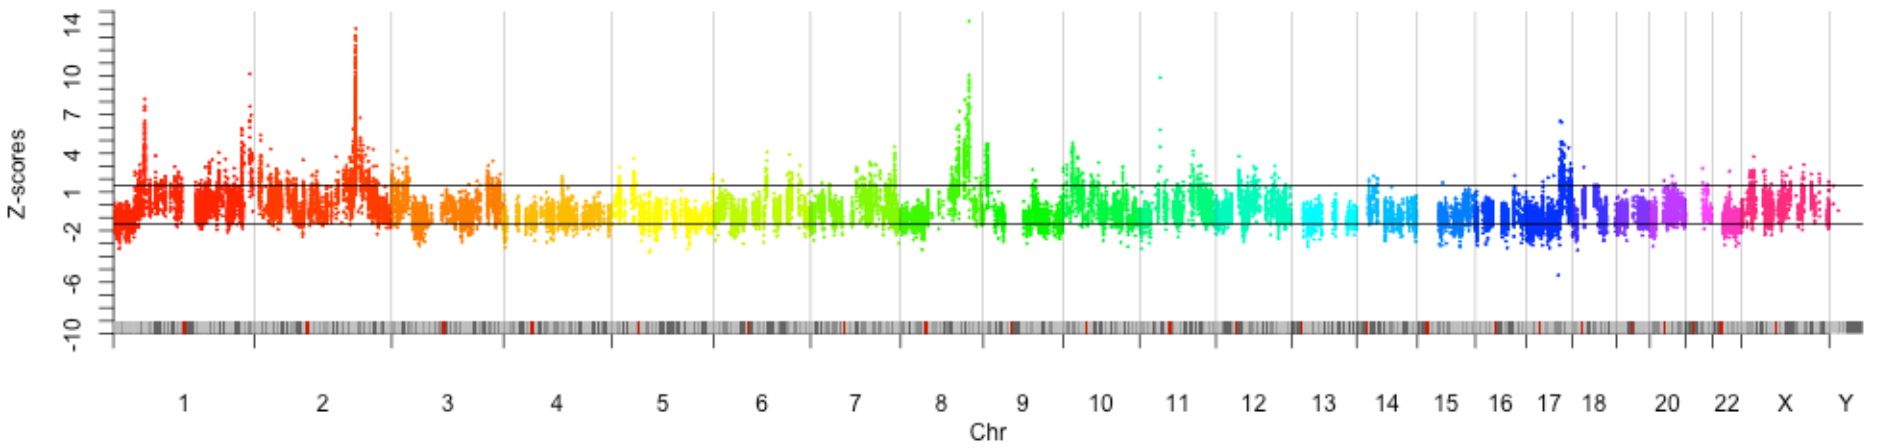

**patient #2491 aCGH data**

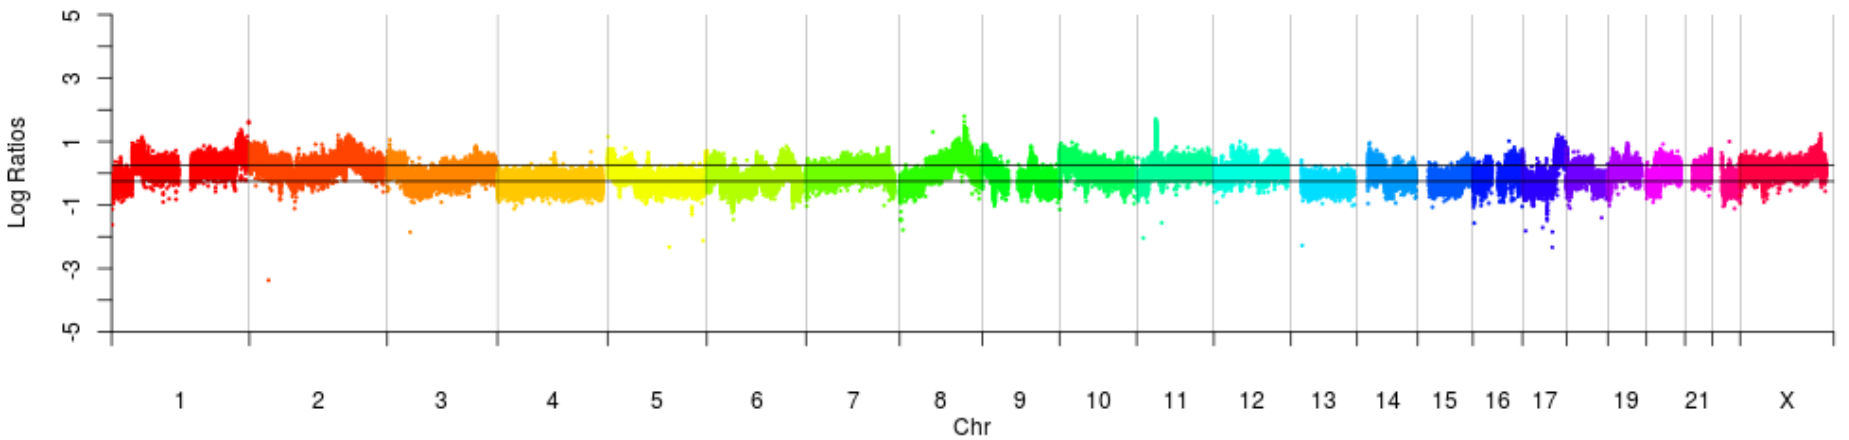



**Patient #2452 exome data**

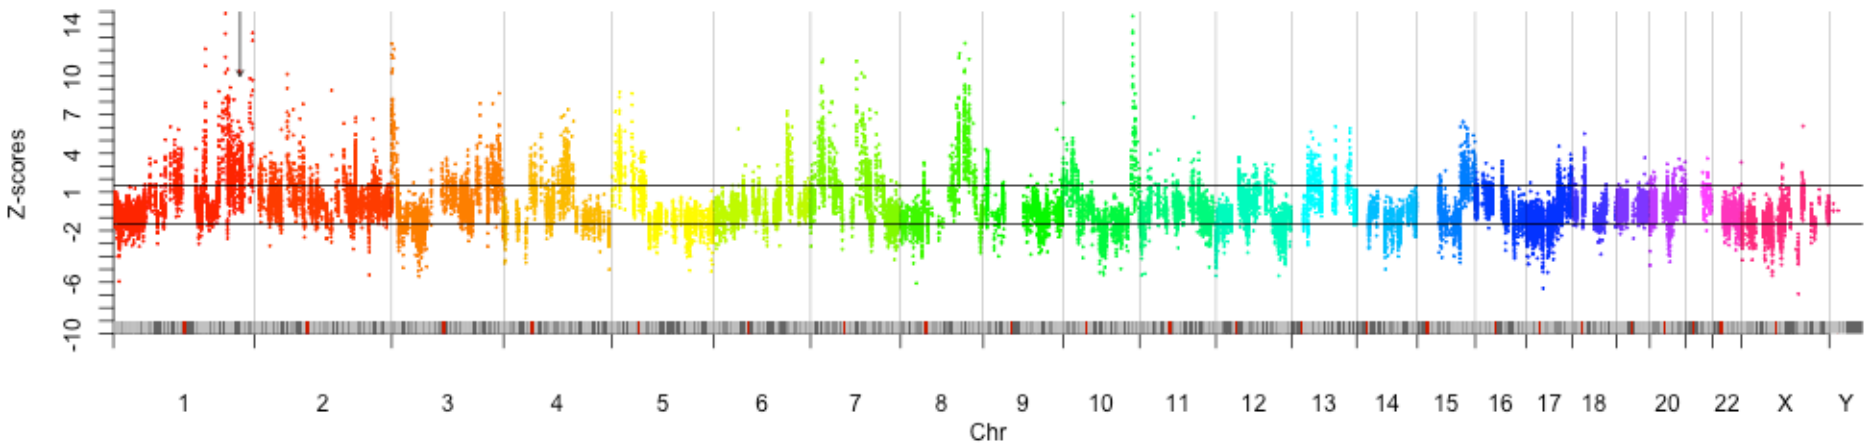

**patient #2452 aCGH data**

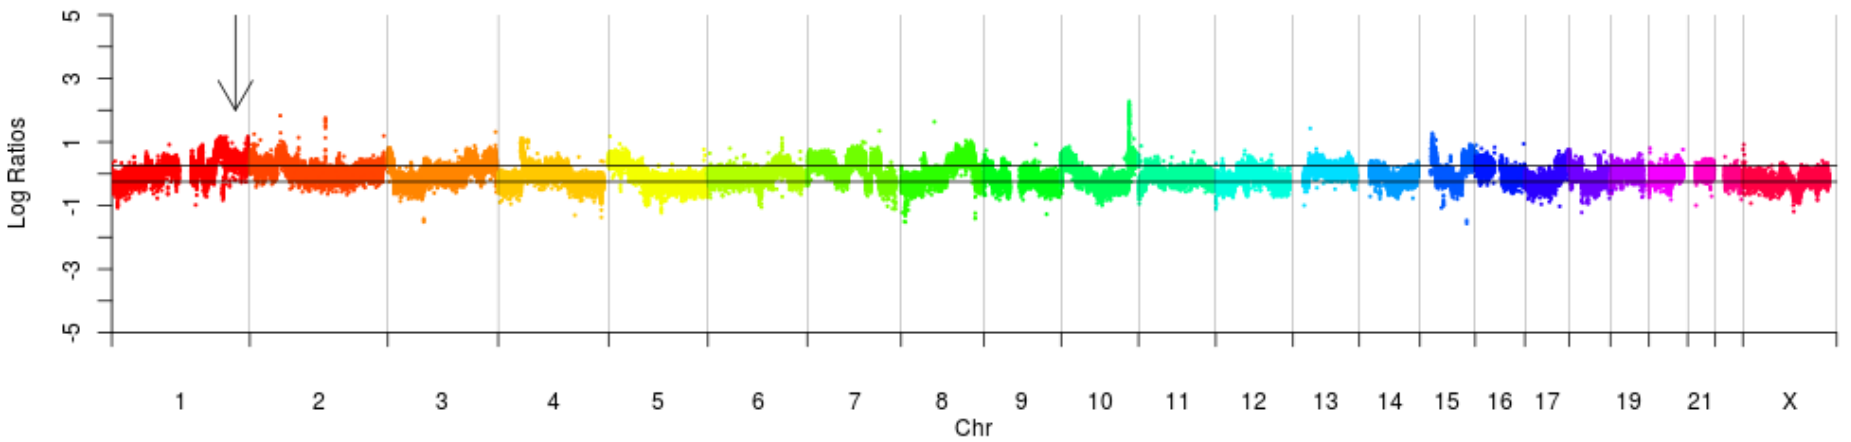

**Patient #2448 exome data**

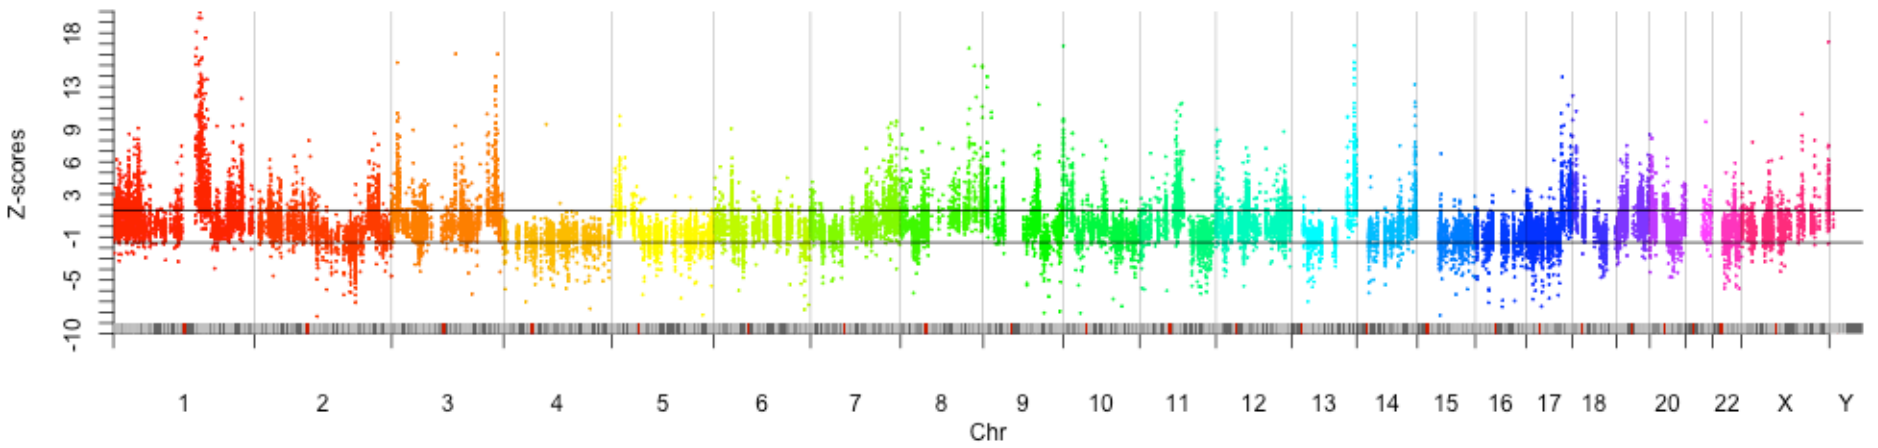

**patient #2448 aCGH data**

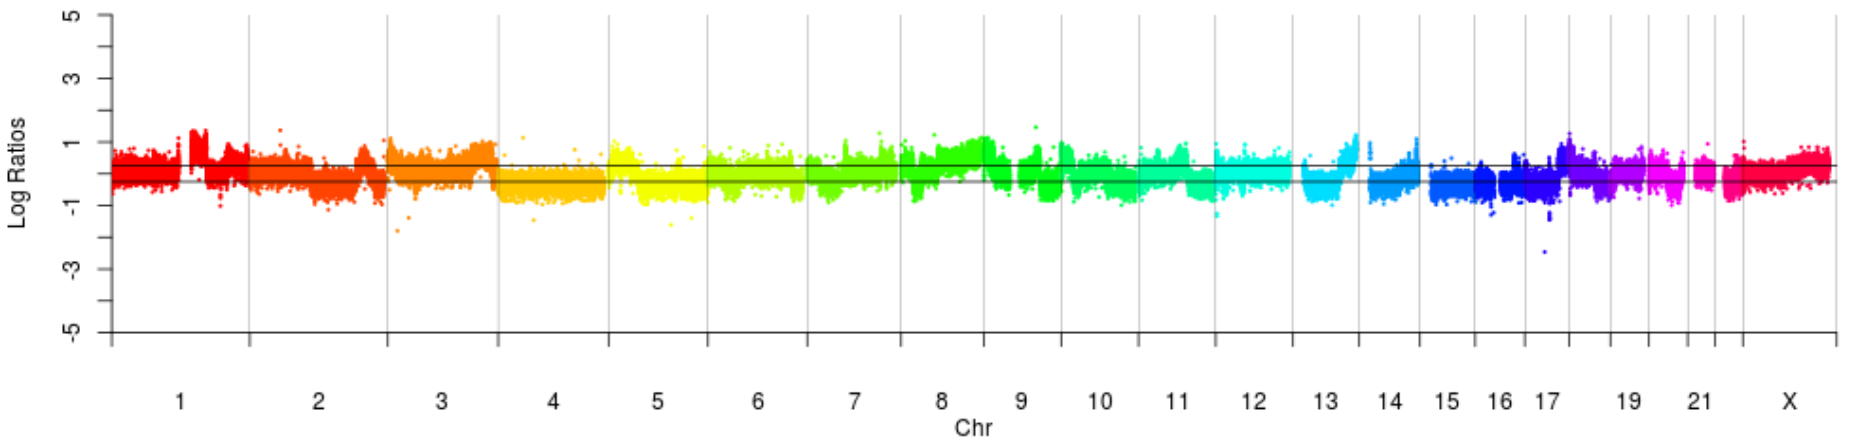

**Patient #2444 exome data**

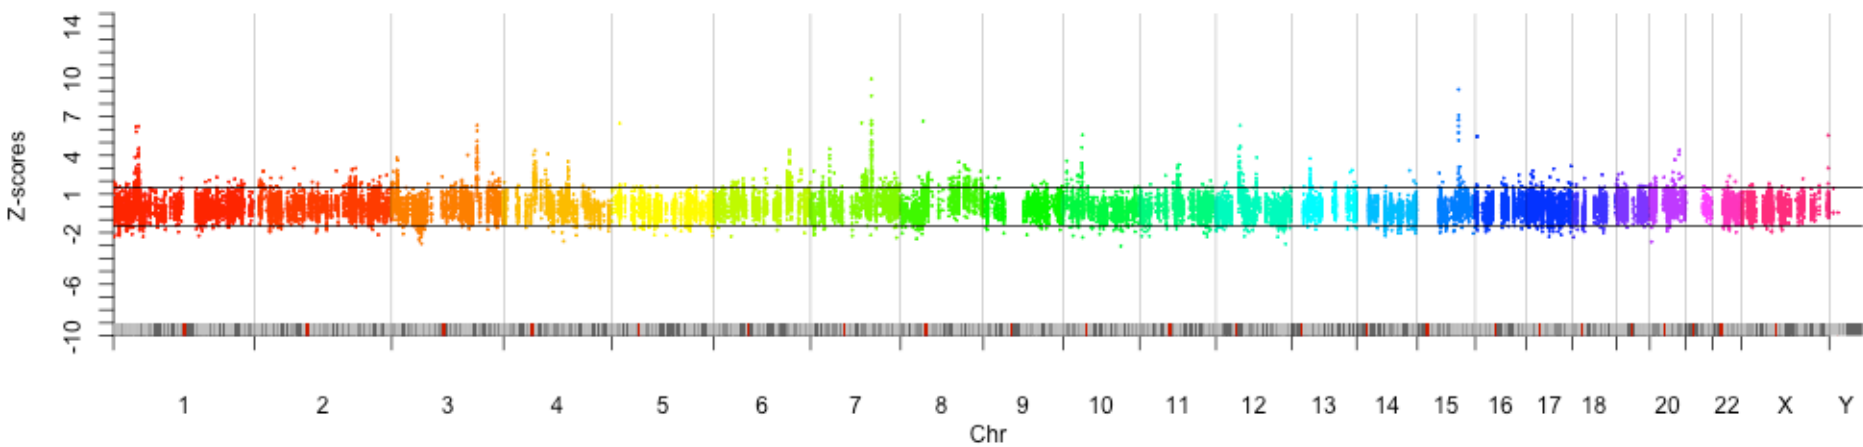

**patient #2444 aCGH data**

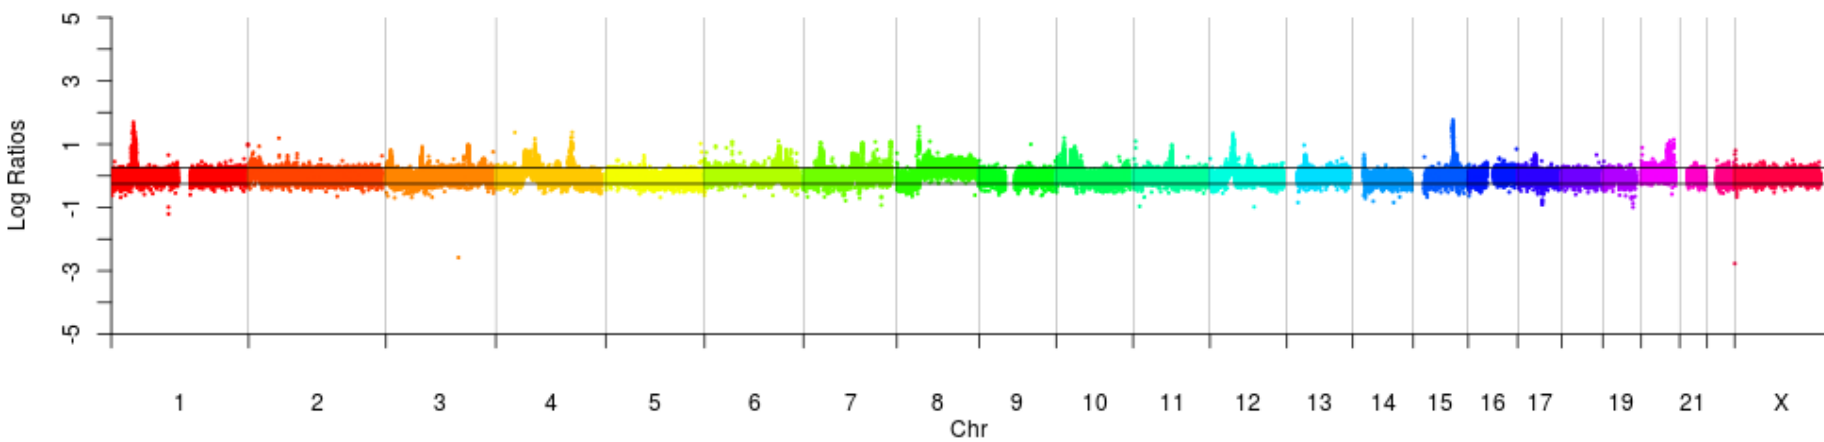

**Patient #2442 exome data**

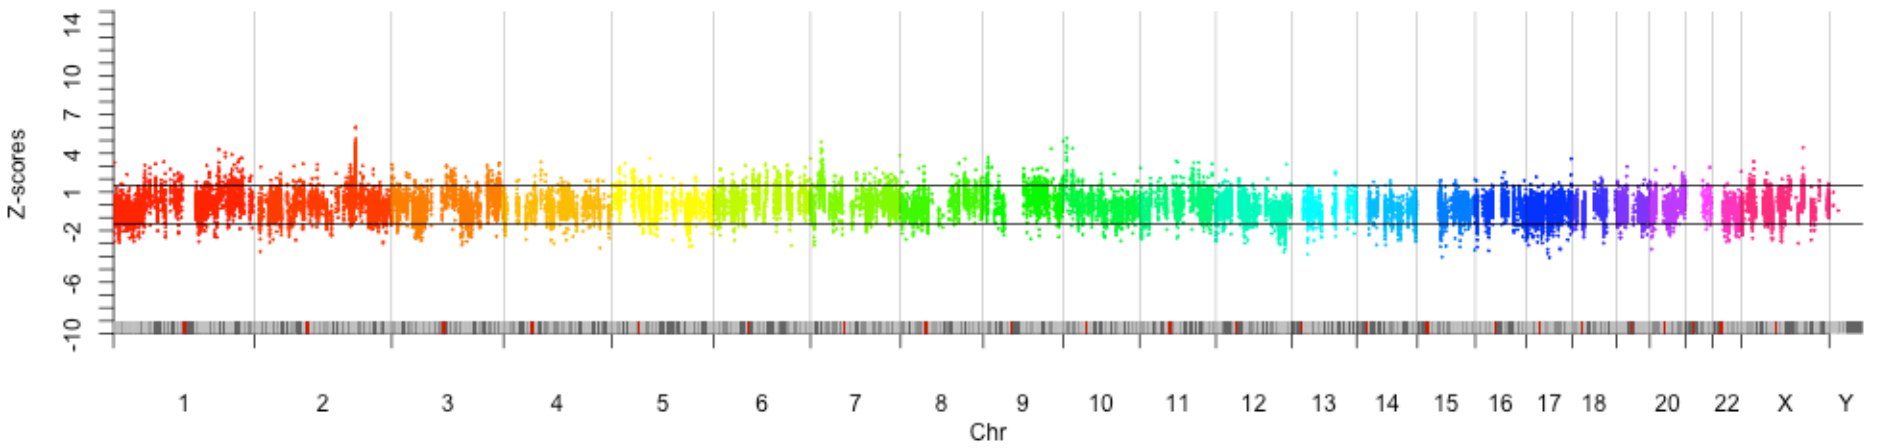

**patient #2442 aCGH data**

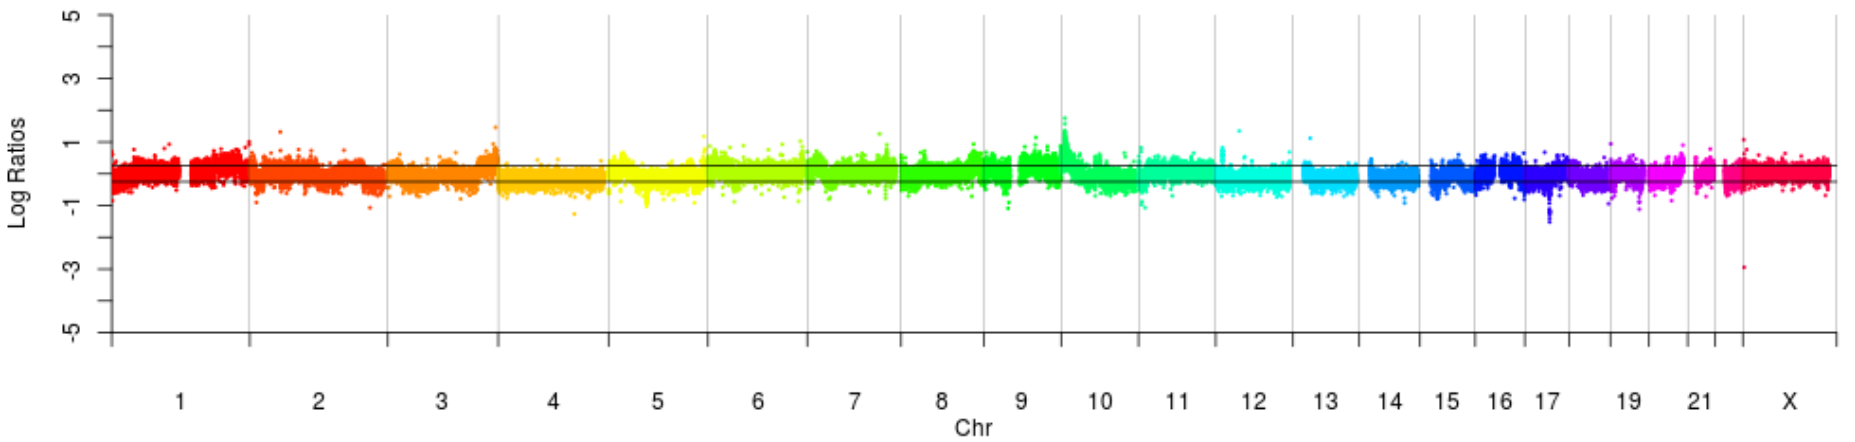

**Patient #2271 exome data**

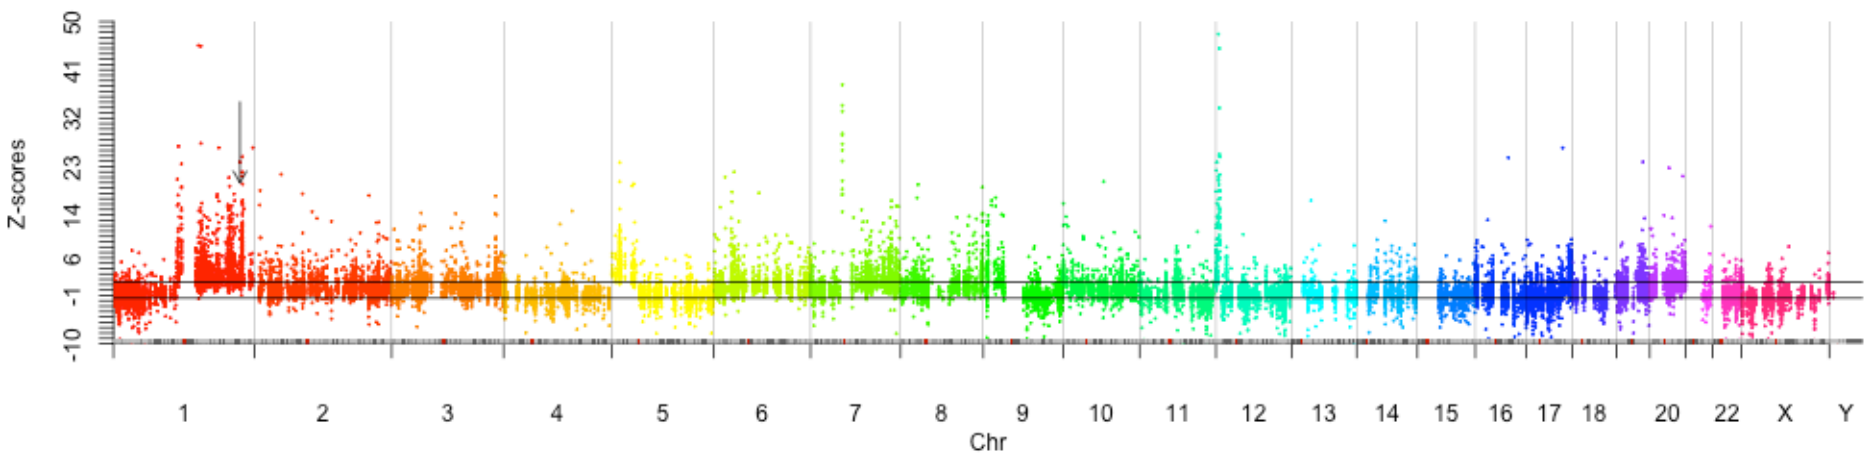

**patient #2271 aCGH data**

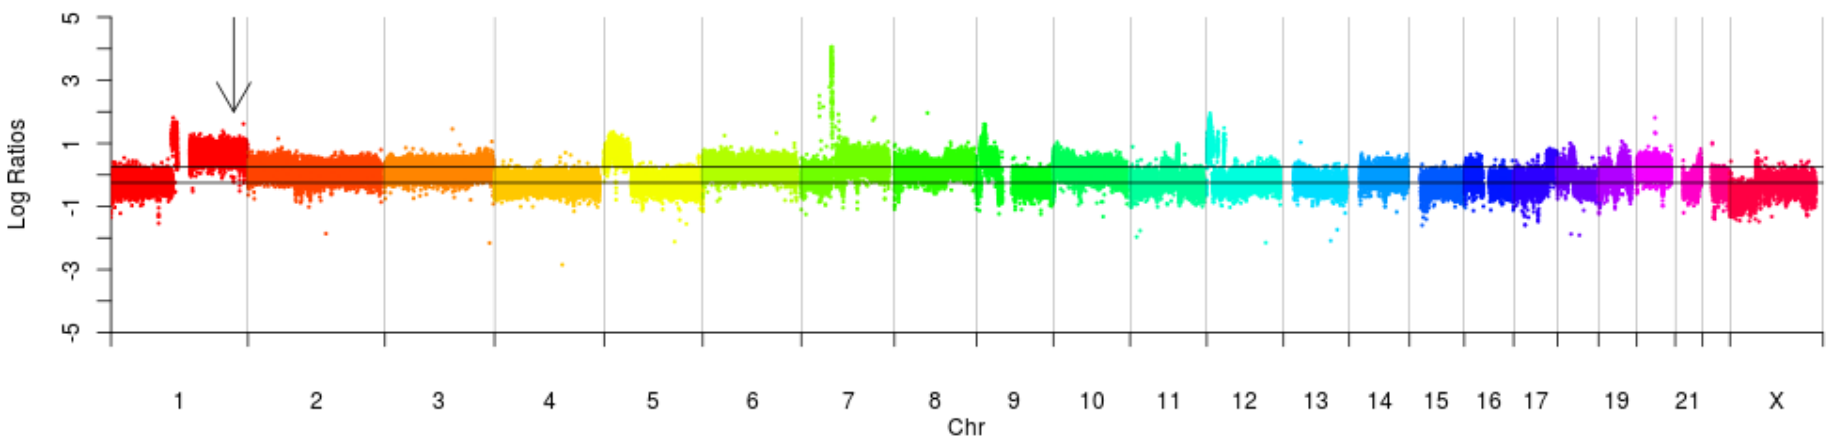

**Patient #2005 exome data**

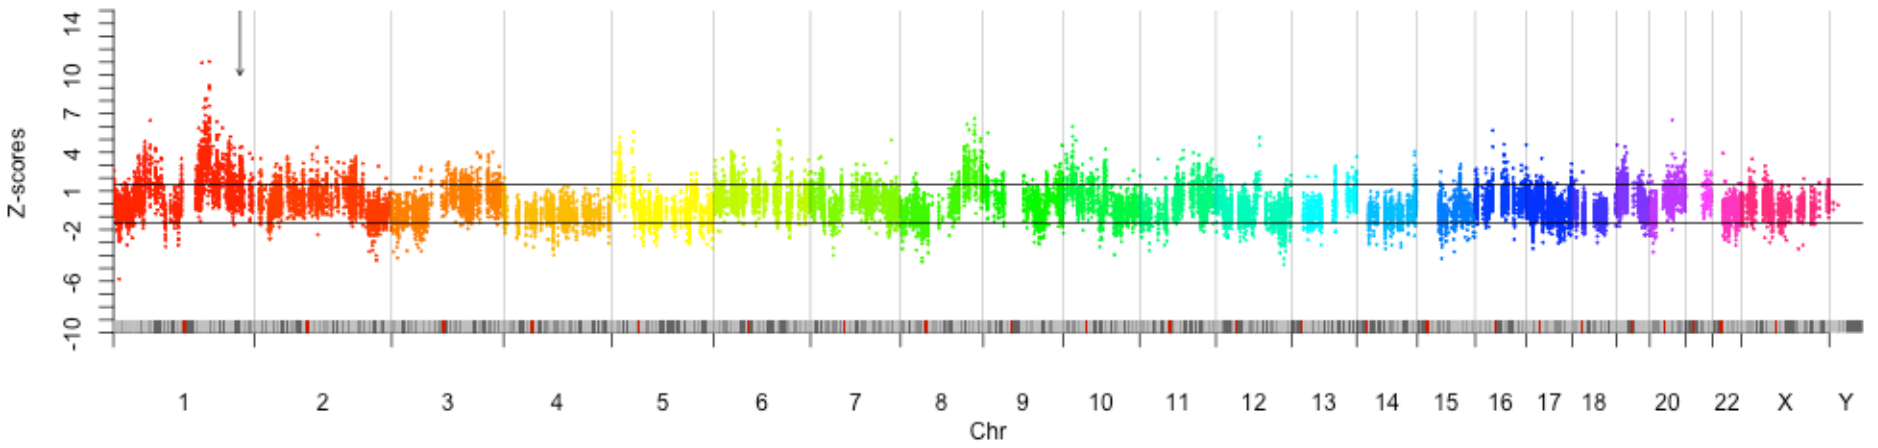

**patient #2005 aCGH data**

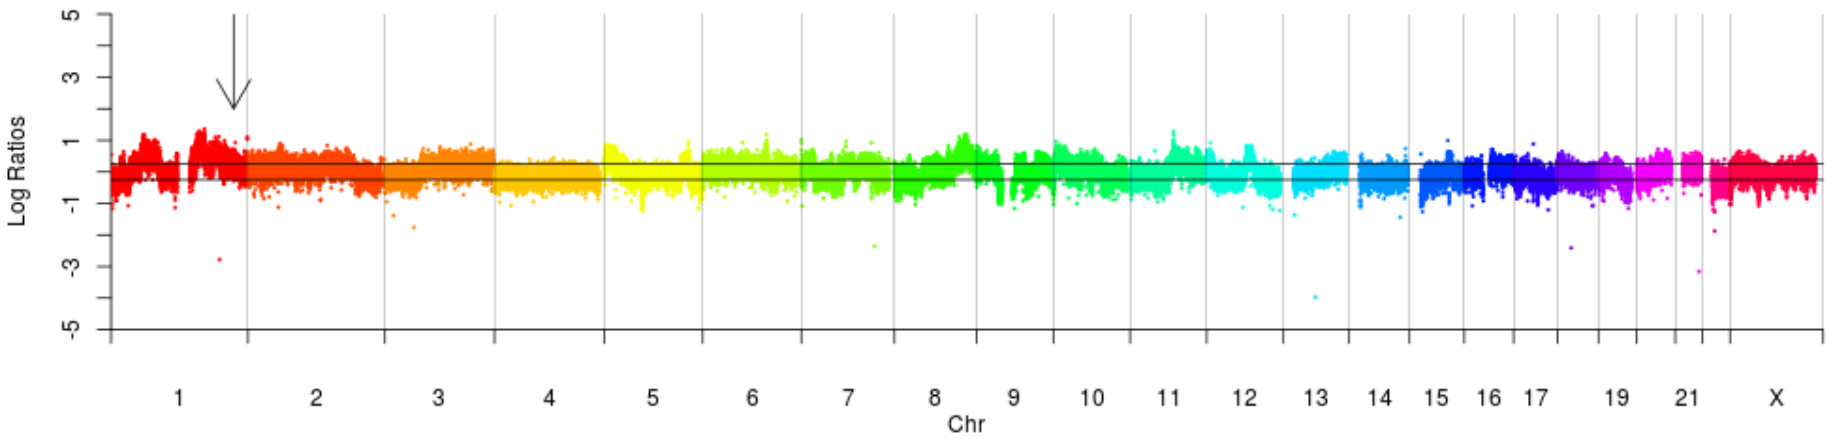

**Patient #168 exome data**

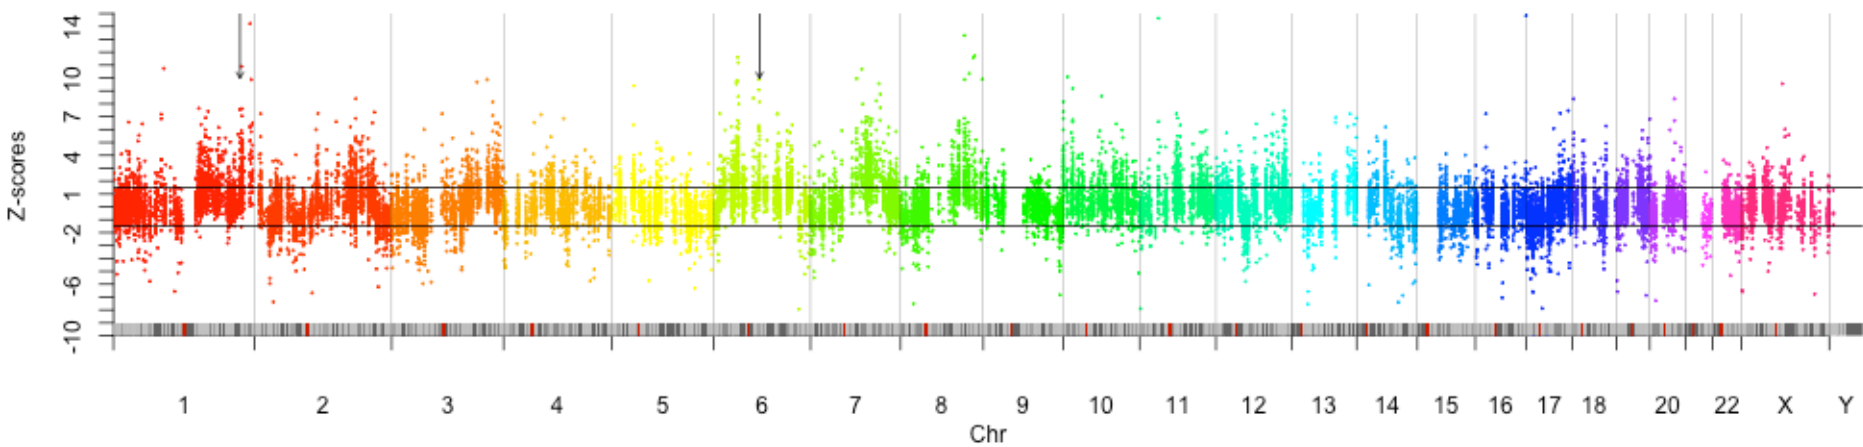

**patient #168 aCGH data**

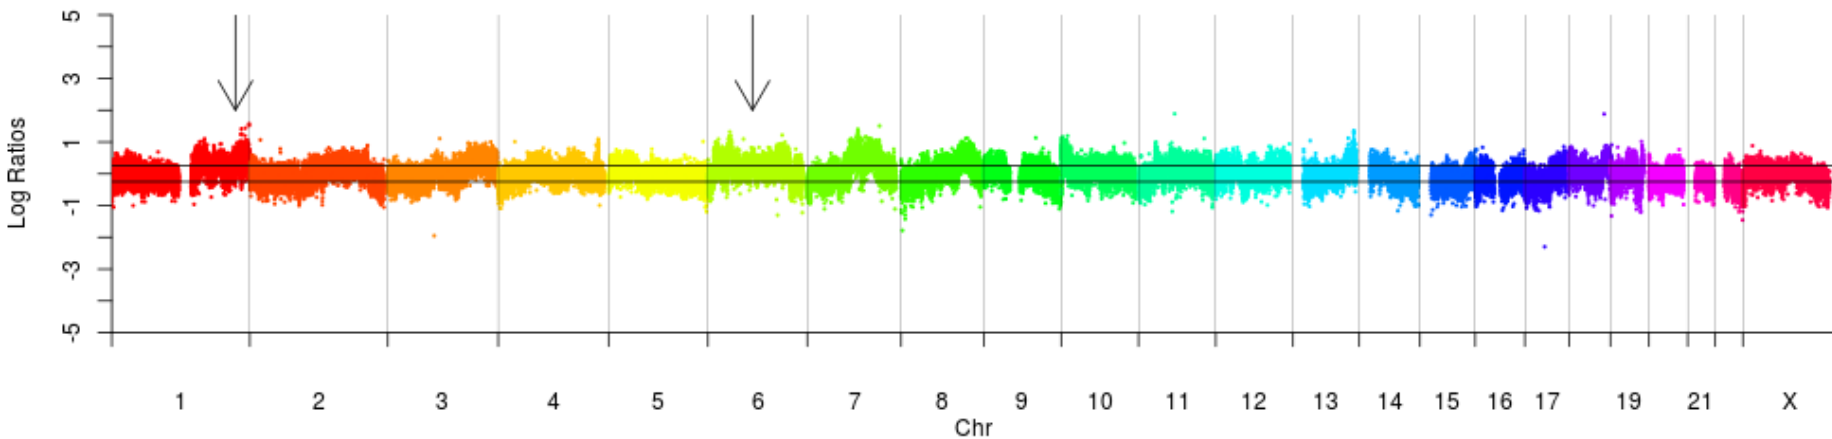

**Patient #161 exome data**

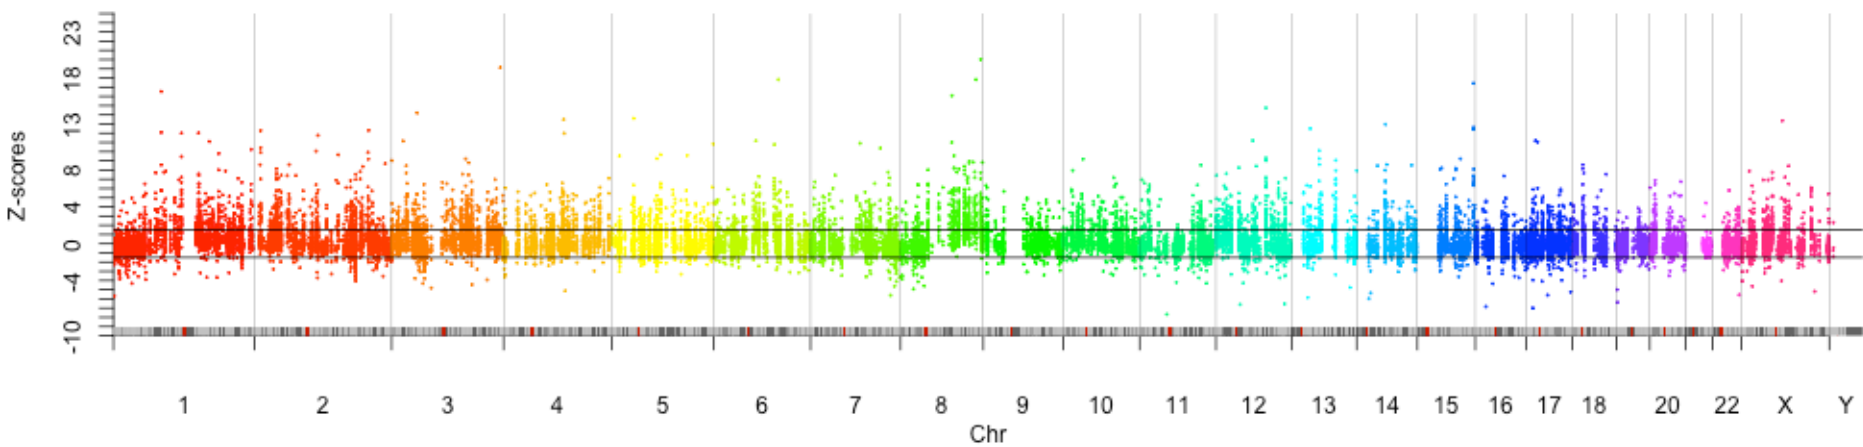

**patient #161 aCGH data**

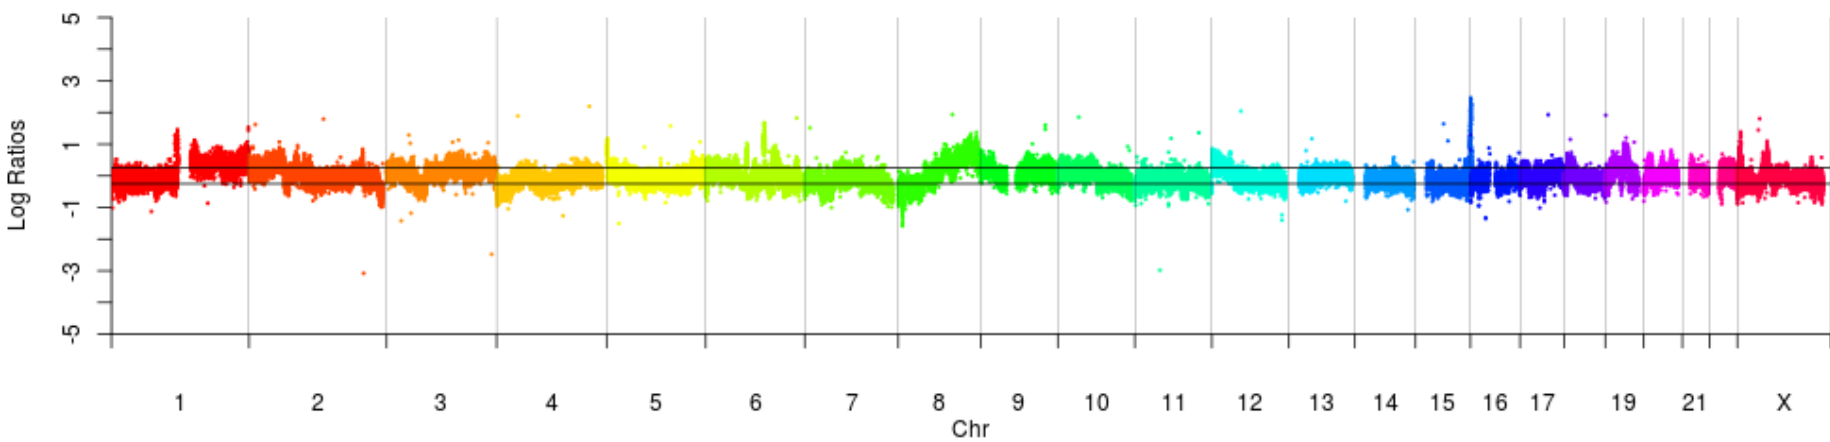

Supplement: 13058_2015_642_MOESM9_ESM.pdf [file 13058_2015_642_MOESM9_ESM.pdf]
